# Supplementary material for: Ambient characterisation of PurpleAir particulate matter monitors for measurements to be considered as indicative
Source: Royal Society of Chemistry journal article supplement (doi:10.1039/d2ea00085g), 2022-01-01
Supplement: d2ea00085g1.pdf [file d2ea00085g1.pdf]

Ambient characterisation of PurpleAir PM  
monitors in terms of indicative measurements –  
Supplementary Information

Alexandre Caseiro<sup>1</sup>, Seán Schmitz<sup>1</sup>, Guillermo Villena<sup>1,2</sup>, Janani  
Venkatraman Jagatha<sup>3</sup>, and Erika von Schneidemesser<sup>1</sup>

<sup>1</sup>Institute for Advanced Sustainability Studies, Potsdam, Germany

<sup>2</sup>Now at Institute for Atmospheric and Environmental Research,  
University of Wuppertal, Wuppertal, Germany

<sup>3</sup>Geographisches Institut, Humboldt-Universität zu Berlin, Berlin,  
Germany

September 1, 2022

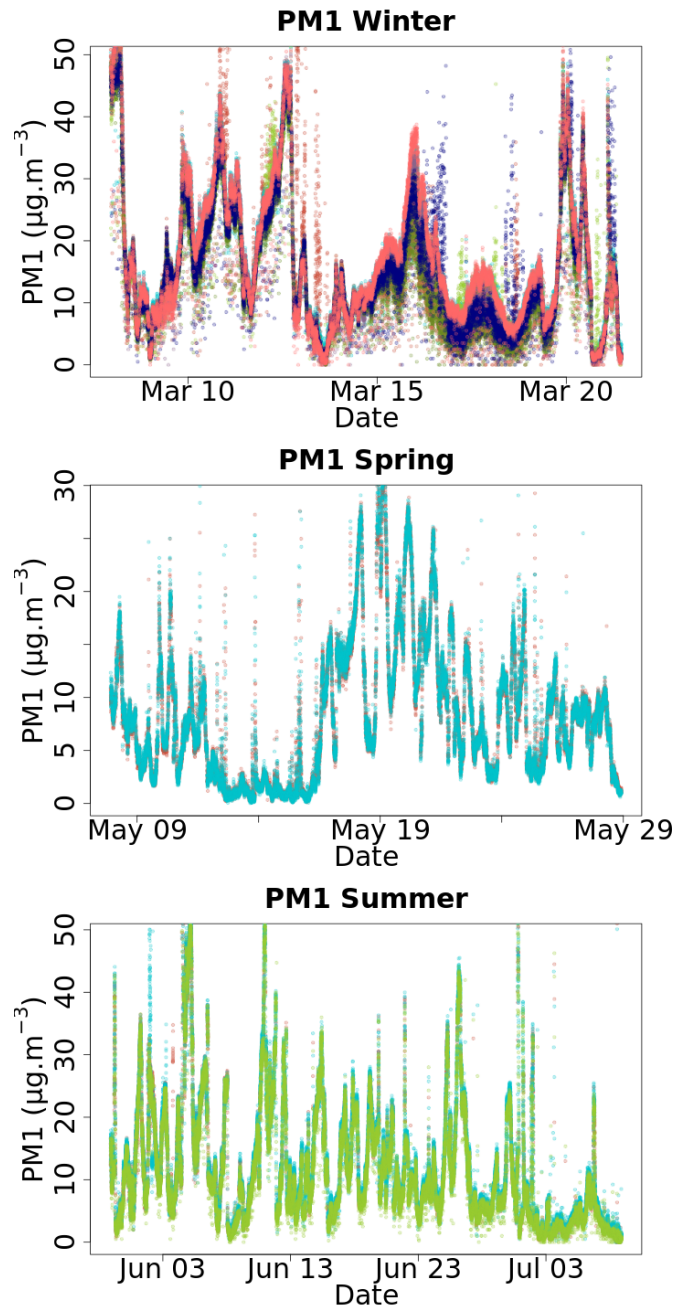

Figure S1: PM<sub>1</sub> time series for the 3 campaigns. The different PurpleAir systems used are differentiated by color.

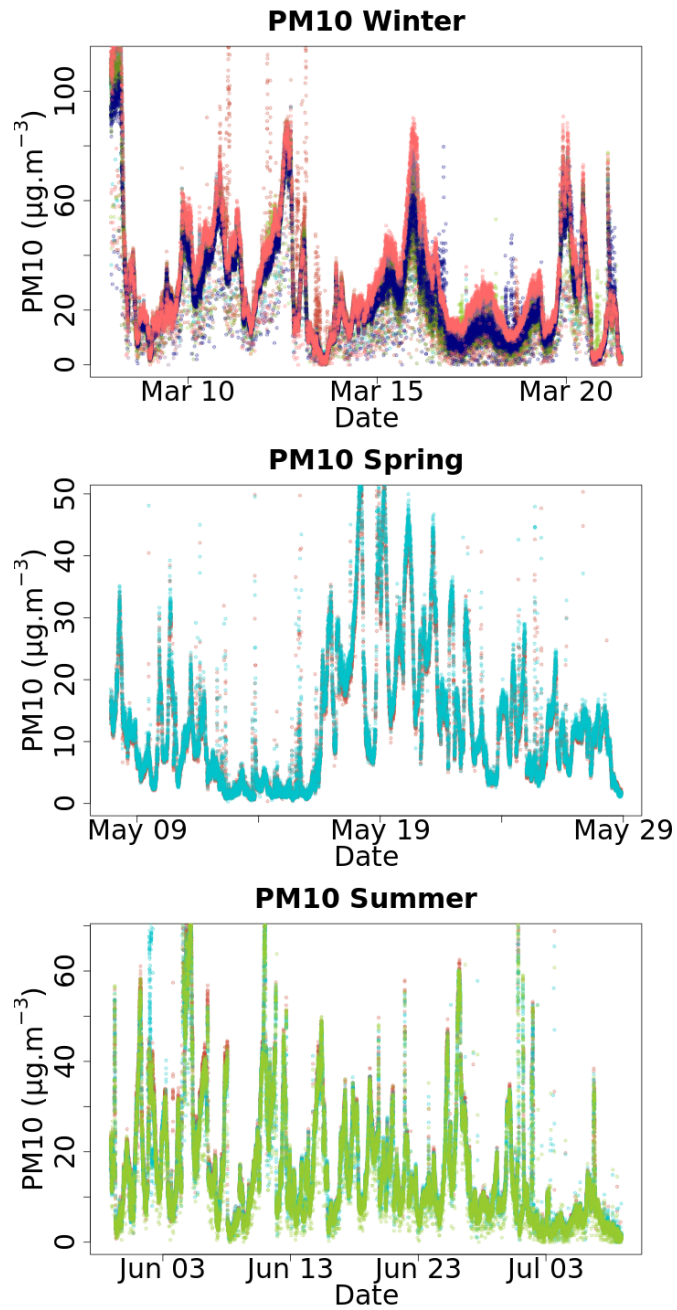

Figure S2: PM<sub>10</sub> time series for the 3 campaigns. The different PurpleAir systems used are differentiated by color.

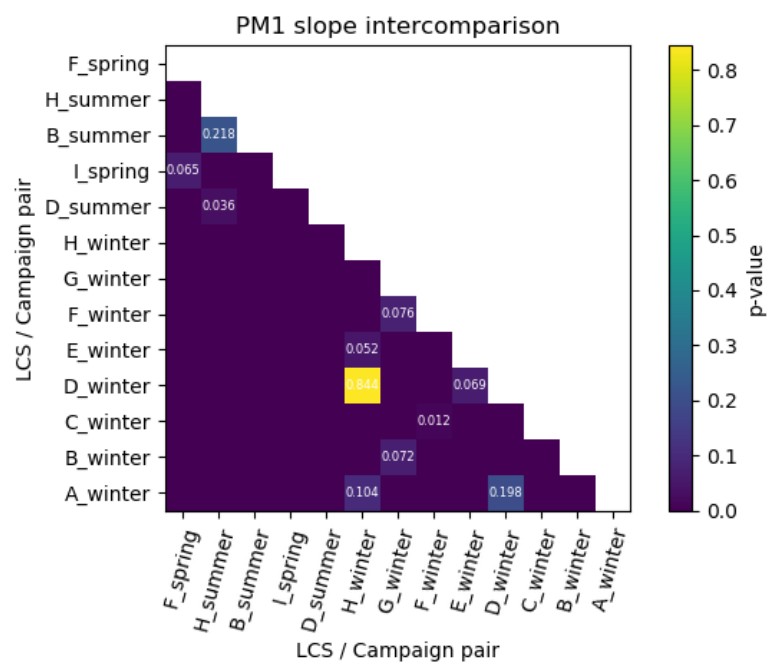

Figure S3: Results of the statistical tests performed on the calibrations (PM<sub>1</sub>). Each calibration is compared to the remaining ones with a t-test on the slopes pair. The color scale in the plots indicate the  $p$ -values from the tests. Only the  $p$ -values which indicate an origin from a same distribution ( $p$ -value > 0.05, with a subsequent Bonferroni correction) are written on the plot.

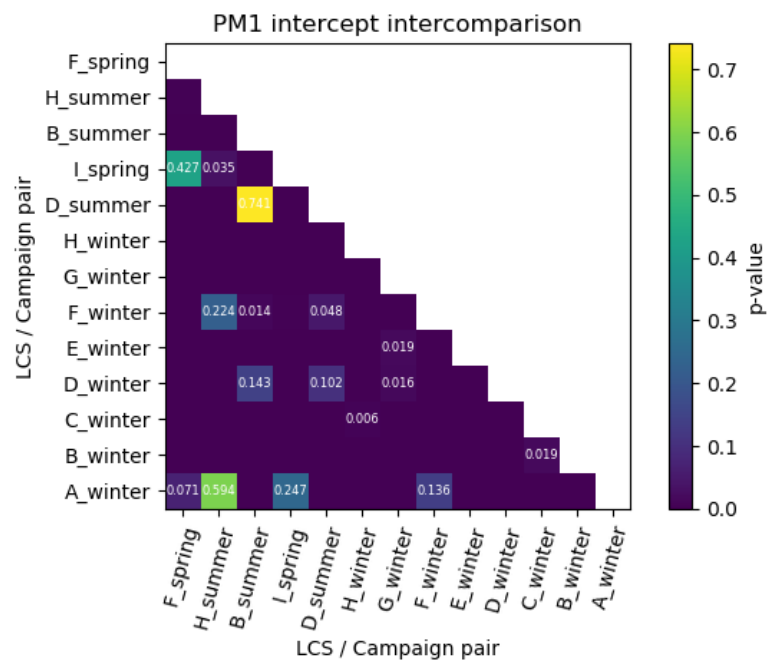

Figure S4: Results of the statistical tests performed on the calibrations (PM<sub>1</sub>). Each calibration is compared to the remaining ones with a t-test on the intercepts pair. The color scale in the plots indicate the  $p$ -values from the tests. Only the  $p$ -values which indicate an origin from a same distribution ( $p$ -value > 0.05, with a subsequent Bonferroni correction) are written on the plot.

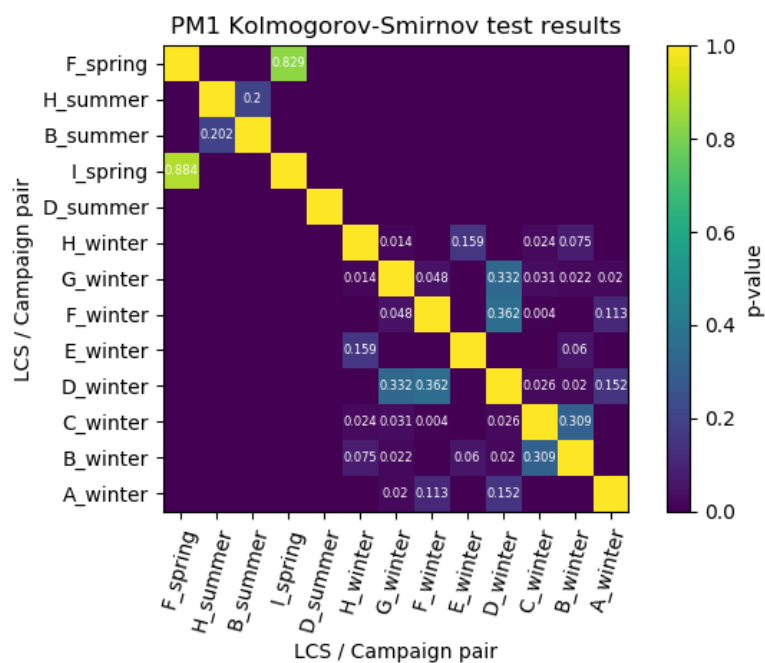

Figure S5: Results of the statistical tests performed on the calibrations (PM<sub>1</sub>). Each calibration is compared to the remaining ones with a Kolmogorov-Smirnov test on the calibrated values. The plot for the Kolmogorov-Smirnov test must be read as follows: Both X and Y axis represent a single sensor/campaign pair. The PurpleAir output for the sensor/campaign pair on the X axis is calibrated with both the linear models from the sensor/campaign pairs on the X and Y axis. The concentrations yielded by both models are tested with the Kolmogorov-Smirnov test. The color scale in the plots indicate the  $p$ -values from the tests. If the calibration functions are equivalent, the Kolmogorov-Smirnov test is expected to show that the yielded calibrated concentrations come from the same distribution. Only the  $p$ -values which indicate an origin from a same distribution ( $p$ -value > 0.05, with a subsequent Bonferroni correction) are written on the plot.

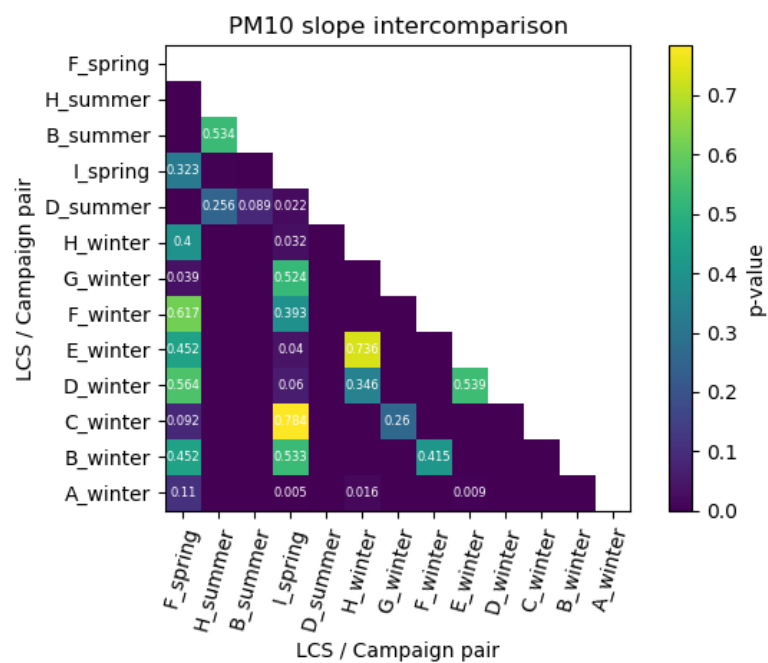

Figure S6: Results of the statistical tests performed on the calibrations (PM<sub>10</sub>). Each calibration is compared to the remaining ones with a t-test on the slopes pair. The color scale in the plots indicate the  $p$ -values from the tests. Only the  $p$ -values which indicate an origin from a same distribution ( $p$ -value > 0.05, with a subsequent Bonferroni correction) are written on the plot.

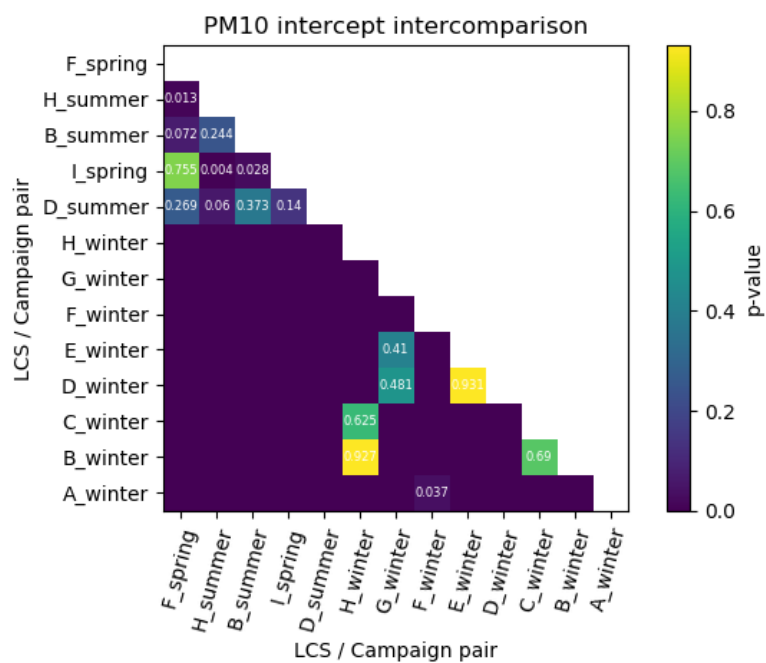

Figure S7: Results of the statistical tests performed on the calibrations ( $PM_{10}$ ). Each calibration is compared to the remaining ones with a t-test on the intercepts pair. The color scale in the plots indicate the  $p$ -values from the tests. Only the  $p$ -values which indicate an origin from a same distribution ( $p$ -value  $> 0.05$ , with a subsequent Bonferroni correction) are written on the plot.



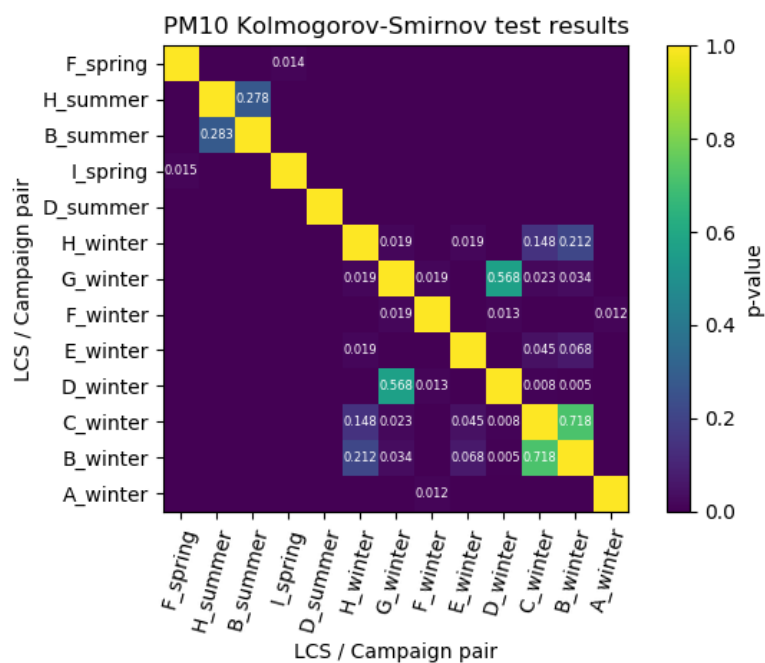

Figure S8: Results of the statistical tests performed on the calibrations ( $PM_{10}$ ). Each calibration is compared to the remaining ones with a Kolmogorov-Smirnov test on the calibrated values. The plot for the Kolmogorov-Smirnov test must be read as follows: Both X and Y axis represent a single sensor/campaign pair. The PurpleAir output for the sensor/campaign pair on the X axis is calibrated with both the linear models from the sensor/campaign pairs on the X and Y axis. The concentrations yielded by both models are tested with the Kolmogorov-Smirnov test. The color scale in the plots indicate the  $p$ -values from the tests. If the calibration functions are equivalent, the Kolmogorov-Smirnov test is expected to show that the yielded calibrated concentrations come from the same distribution. Only the  $p$ -values which indicate an origin from a same distribution ( $p$ -value > 0.05, with a subsequent Bonferroni correction) are written on the plot.

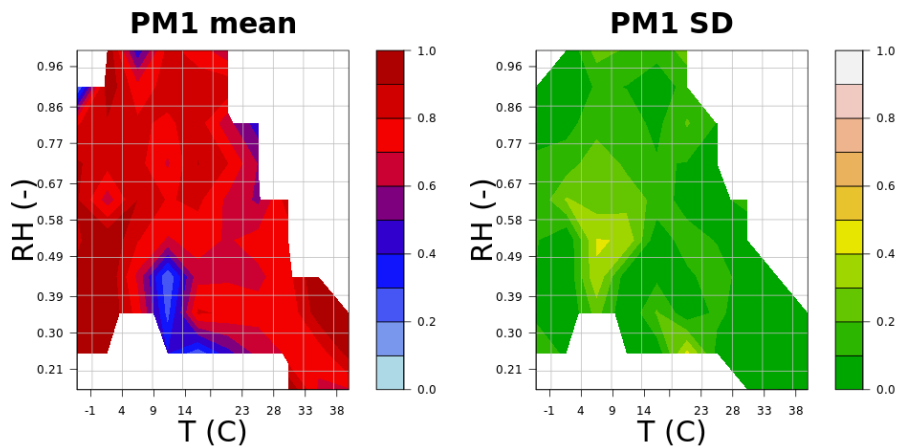

Figure S9: Fraction of indicative low-cost monitor  $\text{PM}_{10}$  measurements (5 minutes time resolution) as a function of temperature and relative humidity (upper panel: average, lower panel: standard deviation, of all the PurpleAir systems). A measurement from a low-cost monitor is considered indicative if it is within  $\pm 50\%$  of the reference measurement. The machine-readable version is freely available.

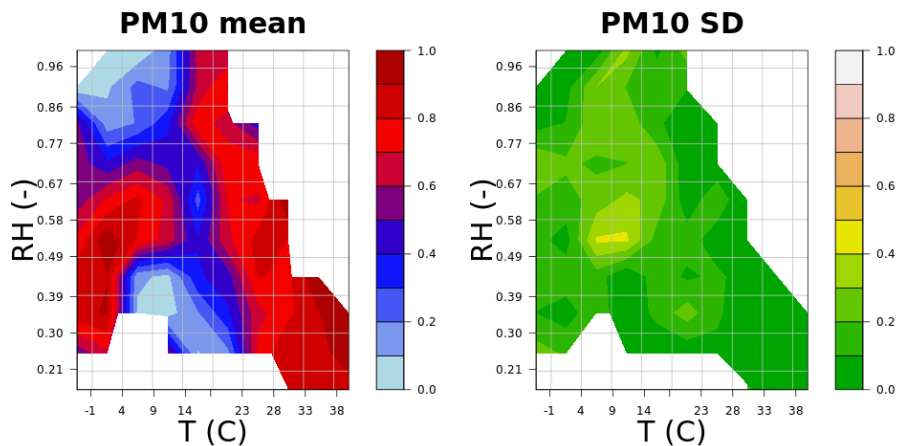

Figure S10: Fraction of indicative low-cost monitor  $\text{PM}_{10}$  measurements (5 minutes time resolution) as a function of temperature and relative humidity (upper panel: average, lower panel: standard deviation, of all the PurpleAir systems). A measurement from a low-cost monitor is considered indicative if it is within  $\pm 50\%$  of the reference measurement. The machine-readable version is freely available.
